# Supplementary material
Source: PubMed Central journal article supplement (PMC8685686)
Supplement: pnas.2112660118.sapp.pdf [file pnas.2112660118.sapp.pdf]

## **Supplementary Information for**

### **Unraveling the genotype by environment interaction in a thermosensitive fish with a polygenic sex determination system**

Benjamin Geffroy<sup>a,1</sup>, Mathieu Besson<sup>b,c</sup>, Núria Sánchez-Baizán<sup>h</sup>, Frederic Clota<sup>a,c</sup>,  
Alexander Goikoetxea<sup>a</sup>, Bastien Sadoul<sup>a,d</sup>, François Ruelle<sup>e</sup>, Marie-Odile Blanc<sup>e</sup>, Hugues  
Parrinello<sup>f</sup>, Sophie Hermet<sup>g</sup>, Eva Blondeau-Bidet<sup>g</sup>, Marine Pratlong<sup>f</sup>, Francesc Piferrer<sup>h</sup>,  
Marc Vandeputte<sup>a,c</sup> & François Allal<sup>a</sup>

<sup>1</sup>Benjamin Geffroy  
Email: bgeffroy@ifremer.fr

#### **This PDF file includes:**

Supplementary text  
Figures S1 to S11  
Tables S1 to S4  
Legends for Datasets S1 to S4  
SI References

#### **Other supplementary materials for this manuscript include the following:**

Datasets S1 to S4

# Supplementary Information Text

## Supplementary Materials and Methods

### Genotyping

SNP calling was done using the ThermoFisher AxiomAnalysisSuite software (v5.1.1.1, Affymetrix, Santa Clara, CA) and quality controls with PLINK 1.9 (Purcell and Chang, 2015).

A first quality control of the genotypes excluded 79 individuals having a genotyping rate lower than 90%: 24 larvae sampled at 77 DD<sub>10</sub> °C, 53 larvae sampled at 242 DD<sub>10</sub> °C, and 2 fish sexed at one year. Using the remaining genomic data set, we applied classical quality control by removing SNPs with a minor allele frequency (MAF) inferior to 5%. The resulting data set included 49,543 SNPs on the parents, grandparents, and the remaining 1951 offspring. Using a subset of 1,000 highly polymorphic SNPs, we reconstructed the pedigree of the offspring using the R package APIS (1). The number of fish assigned to a single parental pair was 1929 out of the 1951 genotyped (98.9%).

### eGST, QTL presence and heritability assessment

For this estimation, we only kept the offspring with a sex phenotype, a genotype and a pedigree, for a total of 1107 individuals, from now on referred to as the “training” dataset. The following model was used to fit the sex phenotype:

$$y = \mathbf{X}b + \mathbf{Z}u + e \text{ (Model 1)}$$

where  $y$  is the vector of binary sex phenotypes (1 = male and 2 = female),  $b$  is a vector of the fixed effects (intercept and temperature).  $\mathbf{X}$  is the incidence matrix relating phenotypes with the fixed effects.  $\mathbf{Z}$  is the incidence matrix relating phenotypes with the random animal genetic effects.  $u$  is the vector of random animal genetic effects with the following distribution  $N(0, \mathbf{G}\sigma^2g)$ , where  $\mathbf{G}$  is the genomic relationship matrix,  $\sigma^2g$  the additive genetic variance, and  $e$  a vector of residuals following a  $N(0, \mathbf{I}\sigma^2e)$  distribution, where  $\sigma^2e$  is the residual variance and  $\mathbf{I}$  the identity matrix. Model 1 was applied for sex as a single trait (considering intercept and temperature as fixed effects). A multi-trait animal model (Model 2) with sex considered a different trait at LT and at HT (sex\_LT and sex\_HT), with intercept as the only fixed effect, was used to estimate the genetic correlation between sex\_LT and sex\_HT.

The variance components ( $\sigma^2g$  and  $\sigma^2e$ ) were estimated using a Gibbs sampler with 500,000 iterations, 100,000 burn-in, and one sample was kept every 20 iterations for posterior analysis. The residual variance  $\sigma^2e$  was set to a value of 1. The posterior distributions were analyzed with the R package boa (2).

The heritability of sex on the PST scale was estimated as:

$$h_u^2 = \frac{\sigma_g^2}{\sigma_g^2 + \sigma_e^2}, \quad (2)$$

Using the sex single-trait threshold model (Model 1) built from the training dataset, and the Genomic-based Estimated Breeding Values (GEBV) of PST, we could obtain an estimated Genetic Sex Tendency (eGST) for the rest of the offspring dataset (offspring with a genotype and a pedigree, but no sex phenotype N= 844) by using the POSTGIBBSF90 software. The accuracy of the model was assessed by applying a leave-one-out cross-validation method on the training population. For this cross-validation, the phenotype of individual  $i$  was masked, and the resulting threshold model was used to predict its  $eGST_i$ , which was then compared to its actual sex phenotype  $y_i$ , using the Receiver Operating Characteristic curves (ROC curves) methodology to assess the efficacy of classifying the animals as male or female. The Area Under Curve (AUC) metric (3) was used to interpret the performance of the genomic prediction models, with values of 1 representing the perfect classifier.

Following the same model as described above (Model 1), we used the posterior SNP solutions to apply a weighted genome wide association scan (wGWAS)(4). At the first iteration,  $\mathbf{G}$  was calculated as  $\mathbf{G} = \mathbf{ZDZ}'/q$ , with  $\mathbf{D}$  equal to the identity matrix (5). Then, direct genomic values (DGVs) were obtained from GEBVs as  $DGV_i = -(\sum_{j, j \neq i} g^{ji} GEBV_j / g^{ii})$  with  $g^{ji}$  elements of the  $\mathbf{G}^{-1}$  matrix (6), and converted to SNP effects as  $a_i = \mathbf{DZ}'\mathbf{G}^{-1}DGV_i$ . A new  $\mathbf{D}$  matrix was computed from the genetic variance explained by each SNP. After two rounds, no further modification of the variance explained by the SNPs was seen. The LOD scores of SNPs were computed as  $-\log(pvalue)$  and a regional variance explained was computed by summing variance explained in 50 SNPs sliding windows. We considered as QTLs the genomic segments that explained a proportion of genetic variance higher than 2%, as done in (7).

## **RNA extraction, RNA-seq and RNA-seq data analysis**

### **RNA extraction**

The gonads of juveniles were particularly small, and the first trial of mRNA extraction with a dedicated kit failed (n = 27). We thus performed mRNA isolation using QIAzol lysis reagent (Quiagen) on remaining gonad samples (n = 43, 22 for LT and 21 for HT) and on individuals at the “flexion” and “all fins” stages. All samples were mechanically disrupted using ball mills using the appropriate QIAzol quantity, following manufacturer instructions. The RNA concentration was assessed by measuring the A260/A280 ratio using the NanoDrop® ND-1000 V3300 Spectrophotometer (Nanodrop Technology Inc., Wilmington, DE, USA) and RNA quality was checked using an Agilent bioanalyzer (Agilent Technologies, Santa Clara, CA, USA) via the

electrophoretic trace method. The RNA integrity number was between 8.5 and 10 for all samples (Table S4). One extraction failed at the “all fins” stages, and one sample presented the lowest RNA quantity, and was removed from the analysis (n total = 68).

## **RNA-Seq**

All RNAs available at the “all fins” stage (n = 68) and at the juvenile stage (n = 43) were used for RNA-Seq. In addition, because of spare space on the sequencer, RNA-Seq was also performed on 10 individuals at the “flexion” stage. We selected five individuals from the LT group and five from the HT group based on their eGST, choosing those which were genetically “weak” females (i.e. with a positive, but not extreme eGST:  $0 < eGST < 0.5$ ).

Because of the difference in RNA quantities extracted from whole bodies or from gonads, cDNA library construction was performed using two separate methods. For whole bodies, libraries construction was described in (8) at the “all fins” stages and was performed similarly at the “flexion” stage.

### cDNA library construction of gonads at the juvenile stage

The 43 libraries from juvenile gonad samples were prepared using a NuGEN Universal Plus mRNA-Seq kit (Tecan, Redwood city, CA, USA) according to the manufacturer’s instructions. Briefly, polyadenylated RNAs were selected on oligo(dT) magnetic beads. Chemical fragmentation of selected RNAs was done. The first-strand cDNA synthesis started (random primers) in the presence of Actinomycin D, in order to prevent spurious DNA-dependent synthesis, improving strand specificity. Following this, the second strand cDNA synthesis and repairing the ends of double-stranded cDNA fragments followed. Then, adapters were ligated at both ends of fragmented nucleic acid, preparing them for hybridization onto a flow cell. Next, a selection of the strand to be sequenced and purification were done. Ligated cDNAs were amplified following a 15-cycle PCR. This step also leads to a selection, since only fragments at both ends will be enriched. PCR products were purified using AMPure XP Beads (Beckman Coulter Genomics, Brea, CA, USA). Libraries were validated using a Fragment Analyzer (Agilent Technologies, Santa Clara, CA, USA) and quantified using the KAPA Library quantification kit (Roche, Bâle, CHE).

### Libraries sequencing:

The 10 “flexion”, 68 “all fins” and 43 gonad samples libraries were pooled in equimolar amounts, denatured with NaOH, and diluted to 20-22 pM before the clustering. This was performed on a cBot system (Illumina, San Diego, CA, USA) and sequencing was performed on an HiSeq 2500

(Illumina, San Diego, CA, USA) using the single-end 1\*50 nt protocol on 9 lanes of a flow cell V4 or V2. Sequencing produced between 5 and 34 million passed filter clusters per library (9).

#### Sequencing quality control

Image analyses and base calling were performed using the Illumina HiSeq Control Software and the Real-Time Analysis component. Demultiplexing was performed using Illumina's conversion software (bcl2fastq 2.20). The quality of the raw data was assessed using FastQC from the Babraham Institute and the Illumina software SAV (Sequencing Analysis Viewer). Potential contaminants were monitored with the FastQ Screen software from the Babraham Institute.

#### RNA-Seq data analysis

A splice junction mapper, TopHat 2.1.1 (10) using Bowtie 2.3.4.3 (11), was utilized to align the RNA-Seq reads to the *Dicentrarchus labrax* genome (NCBI, reference GCA\_000689215.1) with a set of gene model annotations (12). Final read alignments having more than three mismatches were discarded. Samtools (v.1.9)(13) was used to sort the alignment files. Then, the counting was performed with Featurecounts (v.1.6.4 (14)). For both the "flexion" and the "all fins" samples (libraries with high starting material), reads were mapped to the opposite strand of the gene (-s2 option), while for gonad samples (libraries with low starting material), the reads were mapped to the strand of the gene (-s1 option). Before statistical analyses, genes with less than 30 reads (mean of all the analyzed samples) were filtered out.

#### **RRBS sequencing and preliminary analysis**

RRBS pools were sequenced on a HiSeq2500 (Illumina, San Diego, CA) using 50 base pair (bp) single-read sequencing to obtain at least 22.2 million reads/sample (~15x coverage). The adapter-trimmed sequence reads were aligned to the reference genome (seabass\_V1.0.104, GCA\_000689215.1) (12), and methylation values were extracted using Bismark v0.20.0 (15) with default parameters. Following, MethylKit v1.18.0 (16) was used to remove data with low coverage (<10x) and data with extremely high coverage (>99.9<sup>th</sup> percentile of coverage in each sample) to discard reads with possible PCR bias. Furthermore, data were normalized for read coverage distribution between samples.

#### **Data Analysis**

##### Gene Ontology selection

We selected several GO biological processes based on our hypotheses: Sex determination (GO:0007530), Sex differentiation (GO:0007548), Steroids metabolic process (GO:0008202); Regulation of growth rate (GO:0040009), Lipid biosynthetic process (GO:0008610), Execution phase of apoptosis (GO:0097194); Glucocorticoid metabolic process (GO:0008211); Cellular response to heat (GO:0034605); Regulation of gene expression, Epigenetic (GO:0040029); Histone modification (GO:0016570); DNA methylation or demethylation (GO:0044728); Gene silencing by miRNA (GO:0035195); Gene silencing by RNA (GO:0031047); Regulatory RNA binding (GO:0061980) and Germ cell development (GO:0007281). The presence of the genes in these GOs was then tested in regards to the list of genes previously identified as significantly expressed in the models described in the M&M of the main file.

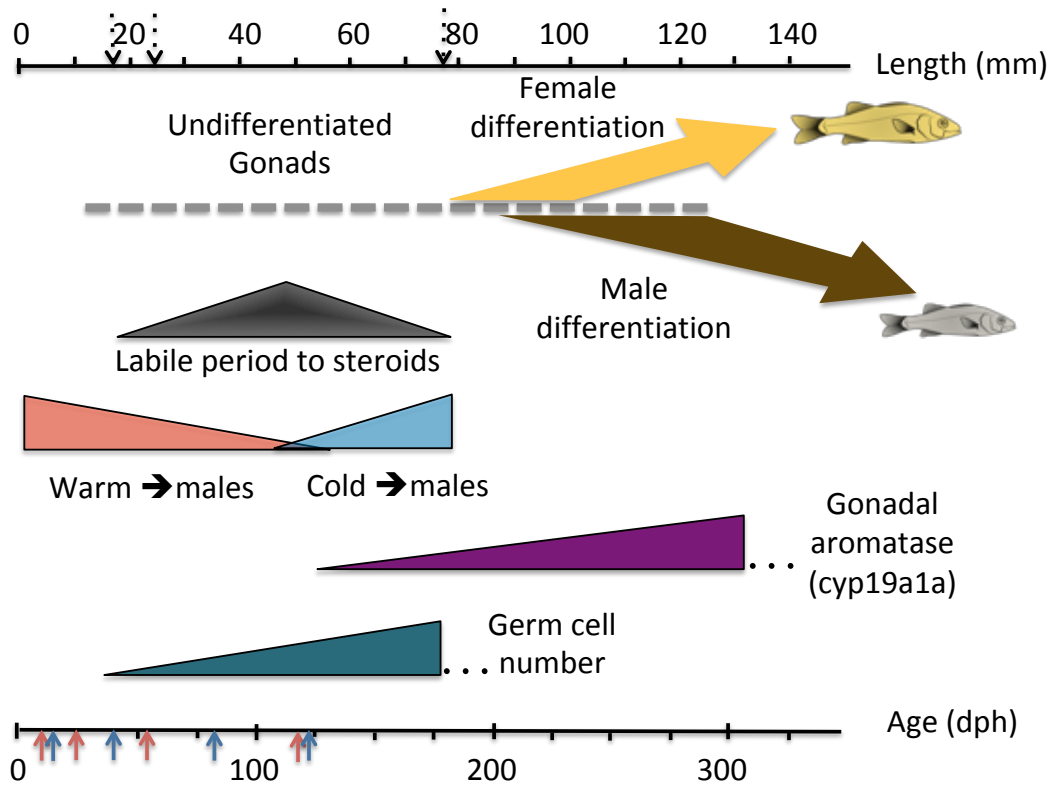

**Fig. S1.** Scheme of the gonadal development of the European Sea bass, modified from (17). The dotted black arrows indicate the size at which larvae were sampled for molecular analyses. The first sampling is not represented since no size (in length) is available and that these larvae only served for genotyping. The blue and red arrows indicate at which age LT and HT larvae were collected, respectively. Red triangle means masculinization when individuals are exposed too early to high temperature based on age at the start of experiment (17), and blue triangle means masculinization when animals are exposed to low temperature for a relatively long period (based on age)(18).

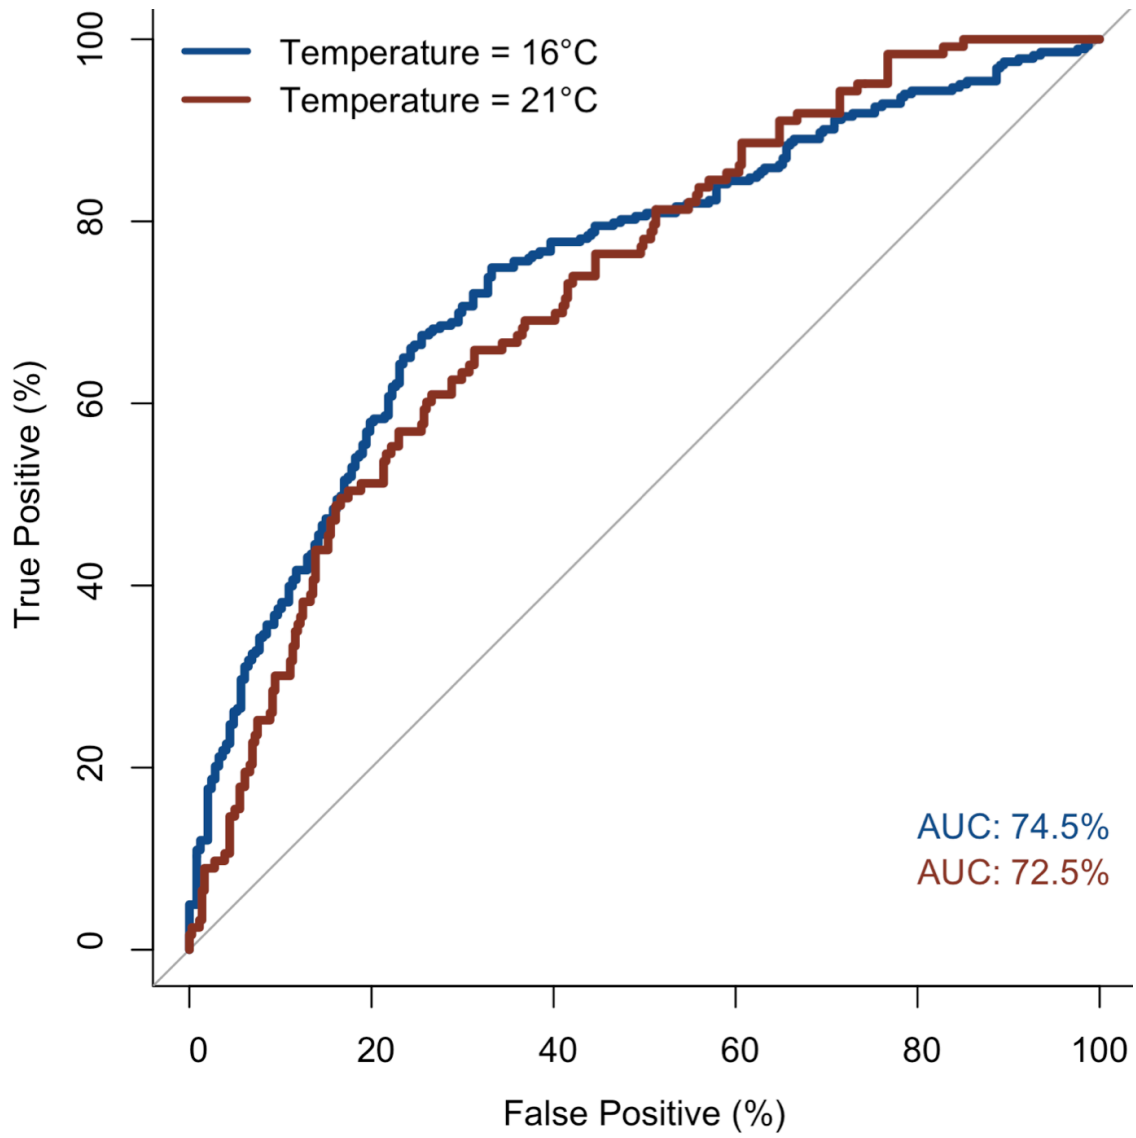

**Fig. S2.** Receiver operator characteristic (ROC) curve and corresponding area under the curve (AUC) metric for genetic sex tendency (eGST) of European sea bass.



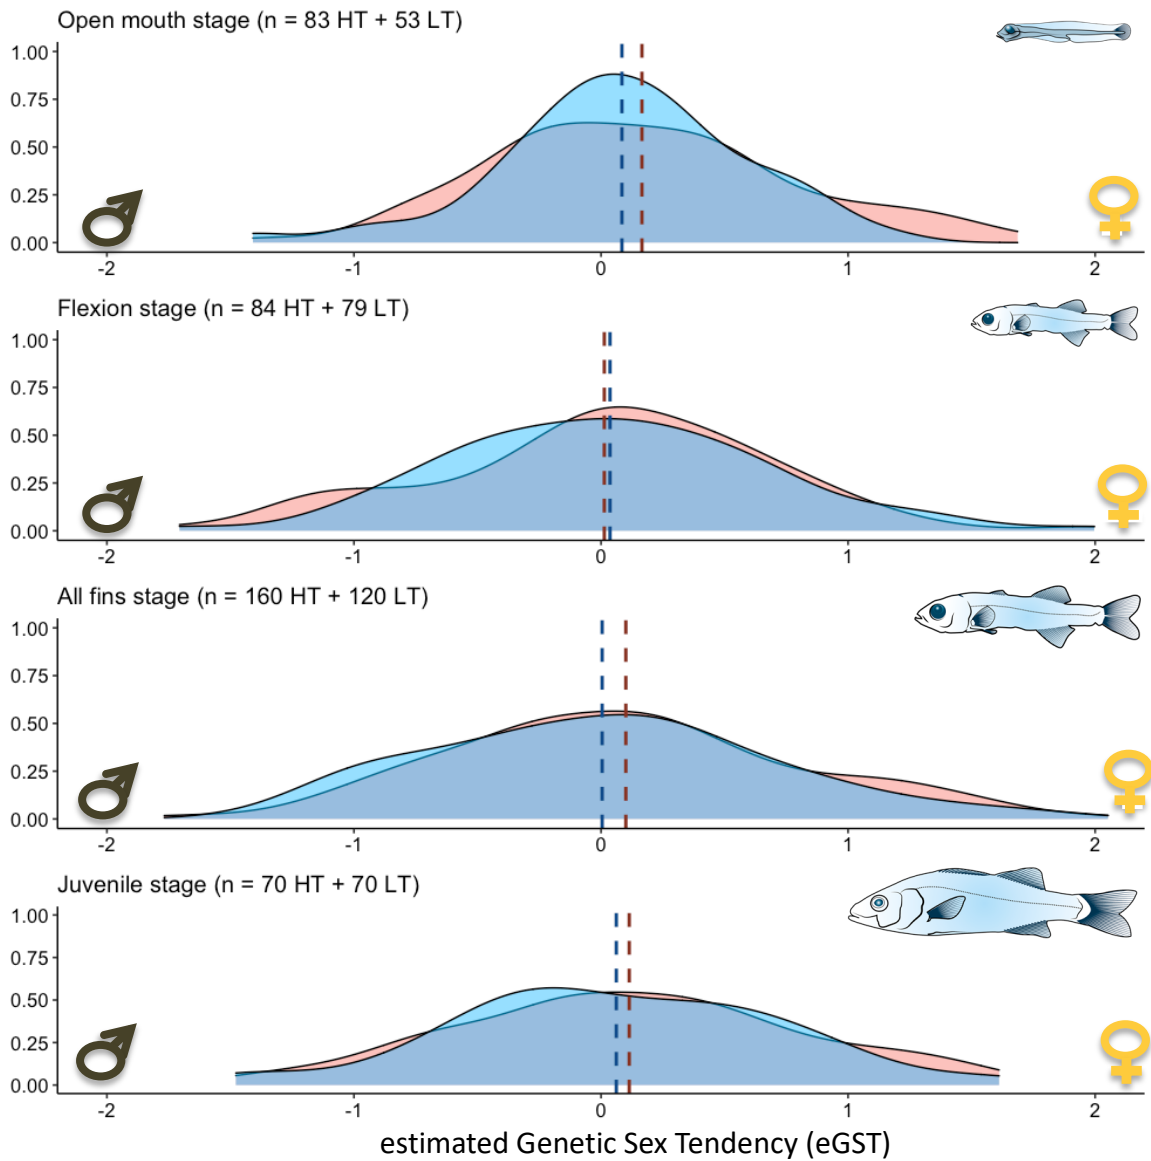

**Fig. S3.** Density plot of the genetic sex tendency (eGST) of European sea bass at four distinct developmental stages and two temperatures: HT= high temperature 21 °C; LT= low temperature 16 °C. The number (n) of genotyped individuals is indicated. The blue (LT) and red (HT) dotted lines indicate the mean genetic sex tendency at each temperature.

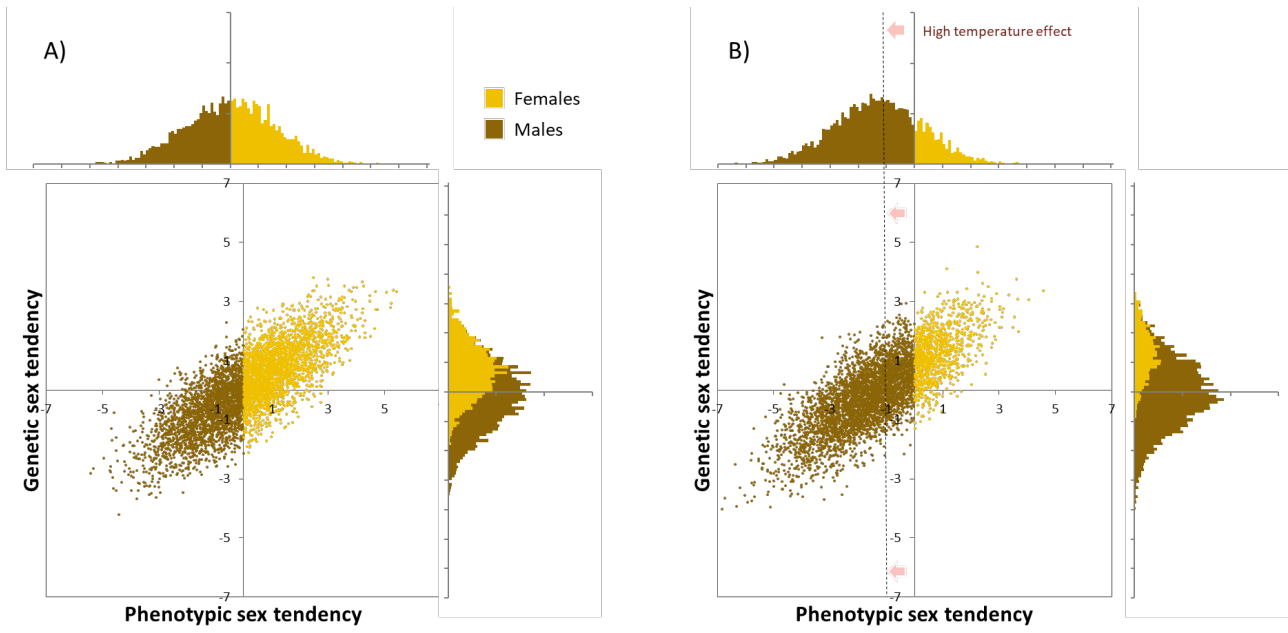

**Fig. S4.** Simulated marginal and joint distributions of phenotypic and genetic sex tendency under the threshold model of polygenic sex determination in A) a sex-neutral environment and B) a masculinizing, high temperature environment. Heritability ( $h^2$ ) of phenotypic sex tendency was set to 0.60. When phenotypic sex tendency is positive, all animals differentiate as females, while they differentiate as males when phenotypic sex tendency is negative. In a sex-neutral environment, the mean phenotypic sex tendency of the population is zero, and thus the sex-ratio is 50:50. High temperature displaces the mean phenotypic sex tendency of the population to the left, resulting in lower proportion of females (here 30%). Note that genetic sex tendency has a lower variance than phenotypic sex tendency, as  $h^2 < 1$ . Also note that  $h^2 < 1$  also implies that only animals with high genotypic sex tendency always differentiate as females, this constraint being even higher in the high temperature environment (B). A total of 5000 individuals were simulated, with environmental variance of sex tendency  $V_E = 1.0$ , additive genetic variance  $V_A = 1.5$  and phenotypic variance  $V_P = V_A + V_E = 2.5$ , which corresponds to  $h^2 = V_A / V_P = 0.60$ .



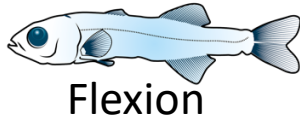

## Biological Processes

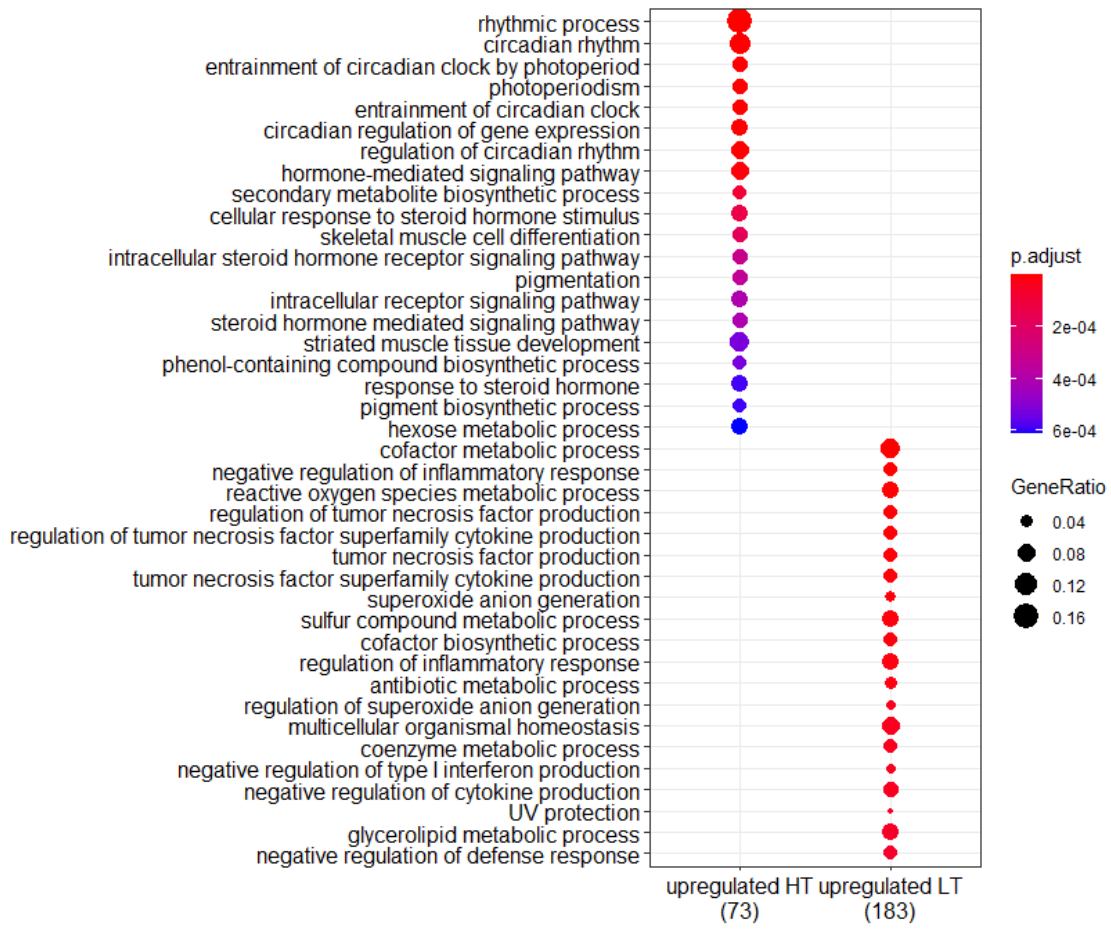

**Fig. S6.** Dotplot showing enrichment of Gene Ontology biological processes for up and downregulated DEGs between low (LT) and high temperature (HT) of whole fish at the “flexion” stage. Data are from the RNA-Seq. The size of the circle represents the number of genes enriched in the entry, and the color indicates the significance of the p-value.

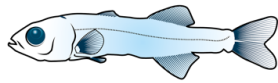

## All Fins

## Biological Processes

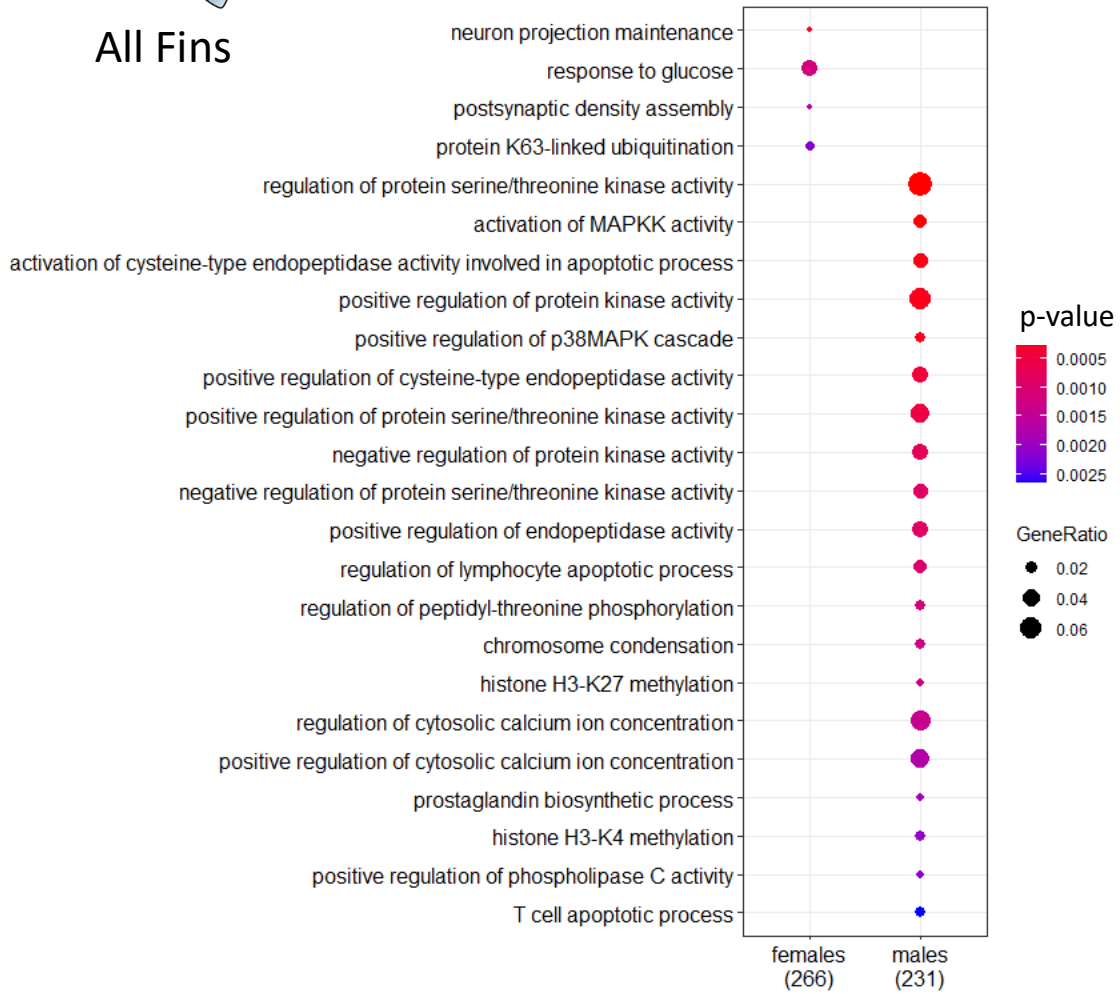

**Fig. S7.** Dotplot showing enrichment of Gene Ontology biological processes for up and downregulated DEGs between females (positive correlation with eGST) and males (negative correlation with eGST) in whole fish at the “all fins” stage (53 and 78 dph, all temperature treatments cofounded). Data are from the RNA-Seq. The size of the circle represents the number of genes enriched in the entry, and the color indicates the significance of the p-value.

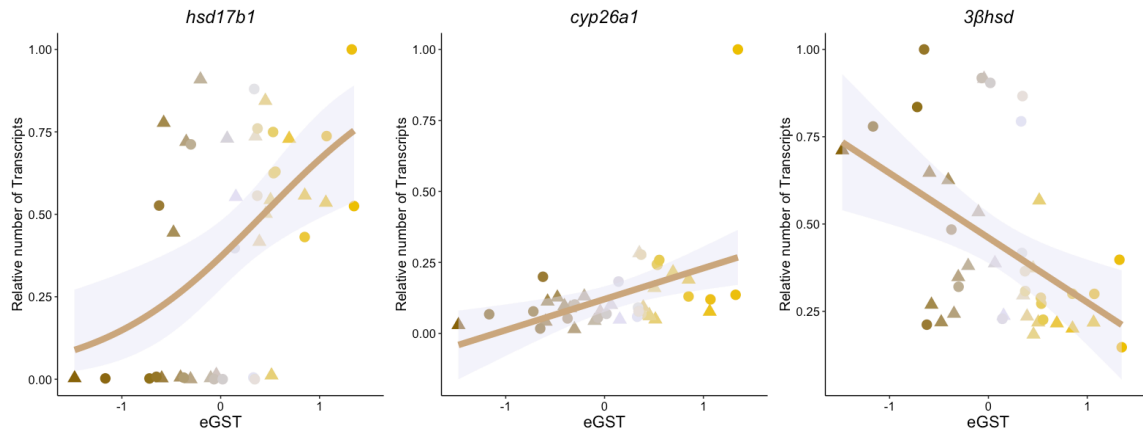

**Fig. S8.** Significant ( $p < 0.01$ ) linear correlation between the estimated genetic sex tendency (eGST) and 3 genes (number of transcripts on the y axis) involved in the GO steroids metabolic process, namely *hsd17b1*, *cyp26a*, and *3β-hsd*, from the RNA-Seq analysis of the gonads of fish at the juvenile stage. Circles represented fish kept at high temperature (HT) = 21 °C; and triangles those kept at low temperature (LT) = 16 °C. Individuals are represented with a color gradient, from maroon to yellow, representing their eGST.

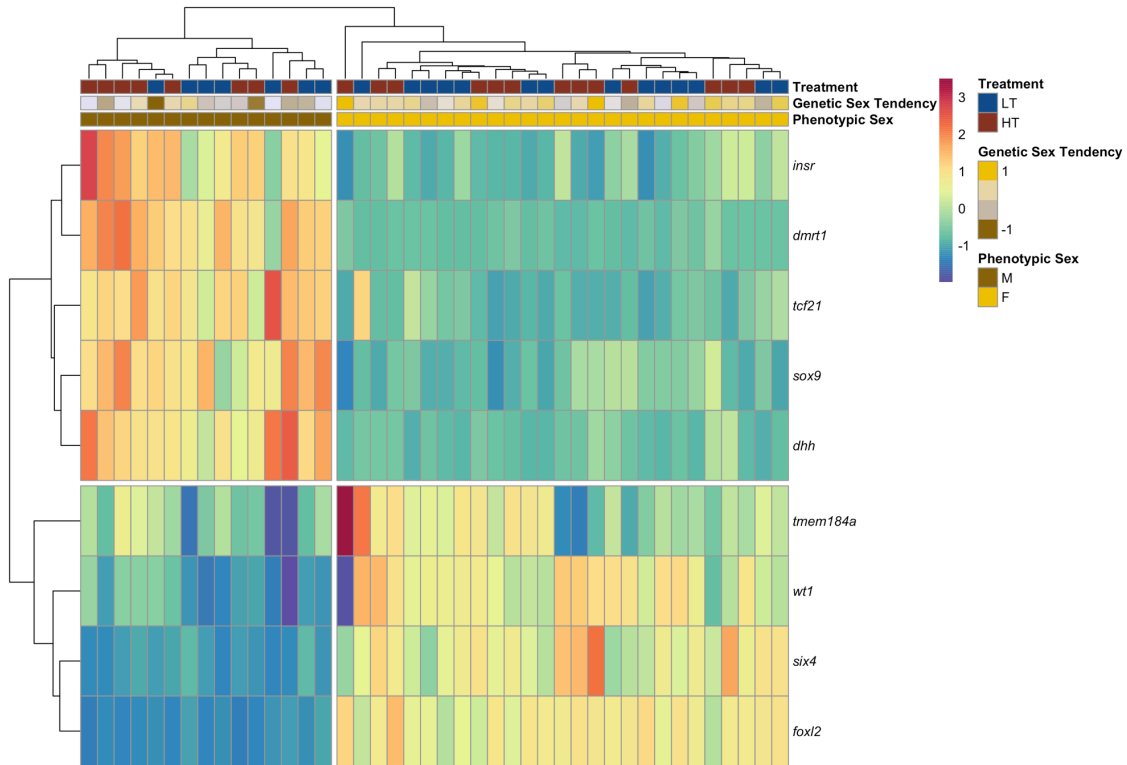

**Fig. S9.** Heatmap of all genes differentially expressed in gonads of fish at the juvenile stage between genetic males (eGST < 0) and genetic females (eGST > 0) in the gene ontology “sex determination”. Individuals are represented with a color gradient, from maroon to yellow, representing their eGST. The phenotypic sex is assessed based on the automatic threshold proposed by the pheatmap package, with individuals represented in maroon considered as phenotypic males and those in yellow considered as phenotypic females. The fish from the high temperature (HT) treatment = 21 °C are represented in red; and those from the low temperature (LT) treatment = 16 °C are represented in blue.

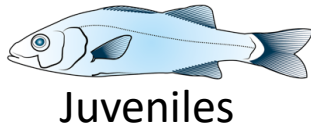

## Biological Processes

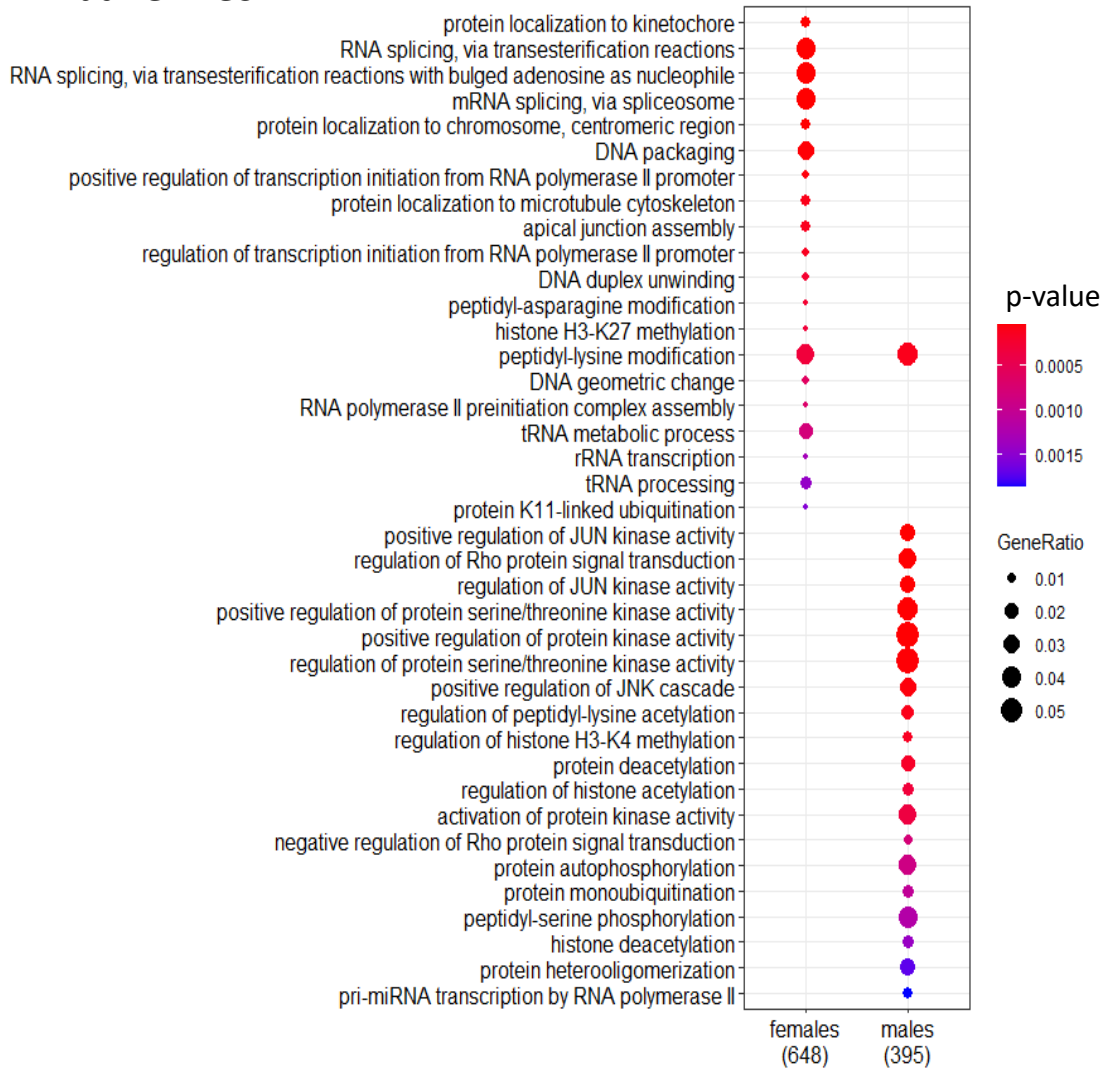

**Fig. S10.** Dotplot showing enrichment of Gene Ontology biological processes for up and downregulated DEGs between females (positive correlation with eGST) and males (negative correlation with eGST) in the gonads of fish at the juvenile stage (117 and 124 dph, all temperature treatments cofounded). Data are from the RNA-Seq. The size of the circle represents the number of genes enriched in the entry, and the color indicates the significance of the p-value.



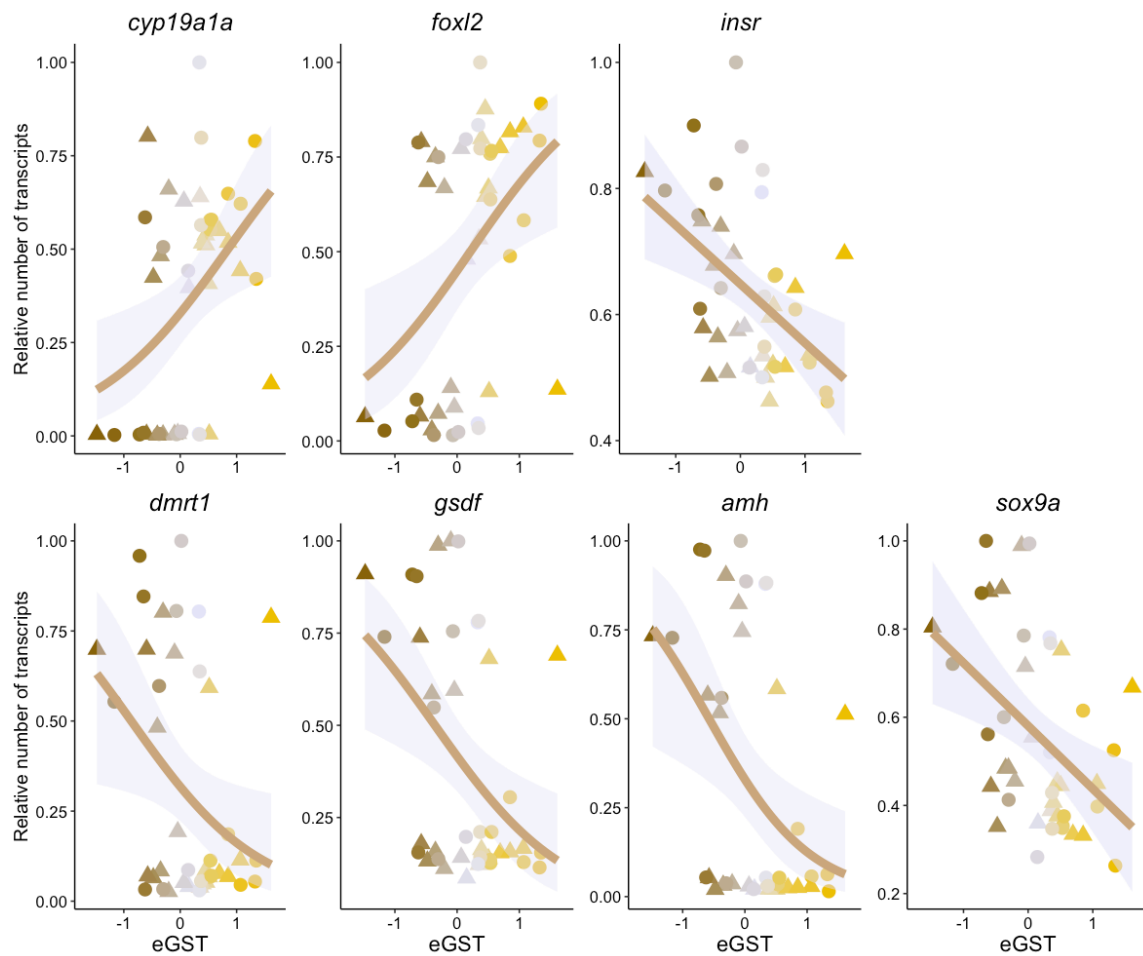

**Fig. S11.** Significant ( $p < 0.01$ ) linear correlation between the estimated genetic sex tendency (eGST) and both *insr* and *sox9a* (relative number of transcripts on the y axis). For five genes, *cyp19a1a*, *foxl2*, *dmrt1*, *amh*, *gsdf*, and the PC1 axis, a dichotomic distribution was observed and modelled with a “quasibinomial” function. Note that the correlation is still detectable with the outlier (extreme positive value at LT). Circles represented fish kept at high temperature (HT = 21 °C; n = 21); and triangles those kept at low temperature (LT = 16 °C; n = 22). Individuals are represented with a color gradient, from maroon to yellow, representing their lower or higher eGST.

**Table S1.** Genes from different GOs that are significantly correlated to the eGST in fish at the “all fin” stage. (the direction of the effect provide the direction of the correlation (negative = male and positive = females)

| Linear Model               |                         |         |                     |                         |         |                       |                         |         |
|----------------------------|-------------------------|---------|---------------------|-------------------------|---------|-----------------------|-------------------------|---------|
| Sex Determination          |                         |         | Sex differentiation |                         |         | Histone modifications |                         |         |
| gene                       | direction of the effect | p-value | gene                | direction of the effect | p-value | gene                  | direction of the effect | p-value |
| sox9a                      | -8,06                   | 0,05    | eif2b5              | 17,90                   | 0,042   | pcgf5                 | 7,11                    | 0,039   |
| sox3                       | -7,64                   | 0,05    | fzd4                | -26,86                  | 0,014   | prkd2                 | -11,64                  | 0,046   |
|                            |                         |         | h3f3b               | -90,28                  | 0,032   | uimc1                 | 14,56                   | 0,012   |
|                            |                         |         | vgf                 | 9,29                    | 0,038   | phf1                  | 10,35                   | 0,028   |
|                            |                         |         | sox9a               | -8,06                   | 0,045   | jarid2                | 4,24                    | 0,025   |
|                            |                         |         | fancg               | -8,50                   | 0,016   | snw1                  | 18,47                   | 0,029   |
|                            |                         |         | hsd17b3             | -10,61                  | 0,009   | gfi1b                 | -3,29                   | 0,047   |
|                            |                         |         | ptprn               | 12,83                   | 0,031   | eya2                  | -6,52                   | 0,033   |
|                            |                         |         | foxc1               | -4,43                   | 0,043   | setd7                 | 28,07                   | 0,031   |
|                            |                         |         | pdgfra              | -30,60                  | 0,019   | prkca                 | 4,29                    | 0,045   |
|                            |                         |         | bax                 | -16,71                  | 0,044   | hcfc1                 | 6,05                    | 0,042   |
|                            |                         |         | patz1               | -11,47                  | 0,008   |                       |                         |         |
| lipid biosynthetic process |                         |         | Growth Regulation   |                         |         |                       |                         |         |
| gene                       | direction of the effect | p-value | gene                | direction of the effect | p-value |                       |                         |         |
| cds2                       | 13,53                   | 0,034   | ppp1r9b             | 10,21                   | 0,049   |                       |                         |         |
| ptges                      | -13,84                  | 0,017   | ptprs               | 24,41                   | 0,037   |                       |                         |         |
| st6galnac4                 | -11,85                  | 0,043   | egfr                | -26,74                  | 0,001   |                       |                         |         |
| ptgis                      | -9,04                   | 0,006   | lamtor2             | -19,86                  | 0,046   |                       |                         |         |
| hsd17b3                    | -10,61                  | 0,009   | jarid2              | 4,24                    | 0,025   |                       |                         |         |
| ddx20                      | 8,25                    | 0,036   | gas1                | -8,16                   | 0,050   |                       |                         |         |
| acot7                      | -12,01                  | 0,028   | myl2                | -42,51                  | 0,030   |                       |                         |         |
| cyp27a1                    | 14,26                   | 0,033   | apbb2               | 15,69                   | 0,009   |                       |                         |         |
| prox1                      | 7,40                    | 0,016   | nf2                 | -8,84                   | 0,050   |                       |                         |         |
| prkag3                     | -7,22                   | 0,015   | prox1               | 7,40                    | 0,016   |                       |                         |         |
| pip5k1c                    | 8,55                    | 0,022   | mmp14               | -55,87                  | 0,047   |                       |                         |         |
| lcat                       | 50,85                   | 0,011   | foxc1               | -4,43                   | 0,043   |                       |                         |         |
| sphk1                      | -4,37                   | 0,032   | rgs2                | -56,13                  | 0,008   |                       |                         |         |
| dgkd                       | -3,94                   | 0,039   | unc13a              | 15,28                   | 0,041   |                       |                         |         |
| ceacam1                    | -11,12                  | 0,009   | bbs2                | 6,09                    | 0,031   |                       |                         |         |
| abcd2                      | 4,53                    | 0,040   | sphk1               | -4,37                   | 0,032   |                       |                         |         |
|                            |                         |         | cspg5               | 18,36                   | 0,047   |                       |                         |         |
|                            |                         |         | sema7a              | -5,82                   | 0,018   |                       |                         |         |
|                            |                         |         | gh                  | 17,56                   | 0,009   |                       |                         |         |

Quadratic  
Model

| gene    | direction of<br>the effect | p-value<br>ST | direction of the<br>quadratic<br>effect | p-value quadratic T°C |
|---------|----------------------------|---------------|-----------------------------------------|-----------------------|
| sgsm2   | 79,48                      | 0,009         | 109,57                                  | 0,014                 |
| map3k3  | -182,14                    | 0,001         | -162,59                                 | 0,039                 |
| entpd2  | 39,85                      | 0,005         | 43,65                                   | 0,035                 |
| hspg2   | -698,83                    | 0,000         | -631,23                                 | 0,026                 |
| bmp7    | -50,72                     | 0,004         | -55,32                                  | 0,031                 |
| rasgrf1 | 69,51                      | 0,010         | 77,17                                   | 0,050                 |
| eno2    | 186,27                     | 0,006         | 228,42                                  | 0,023                 |

**Table S2.** Genes from different GOs that are significantly correlated to the eGST in the gonad of juveniles fish. (the direction of the effect provide the direction of the correlation (negative = male and positive = females)

| Sex differentiation |                         |         | Sex Determination |                         |         | Histone modifications |                         |          |
|---------------------|-------------------------|---------|-------------------|-------------------------|---------|-----------------------|-------------------------|----------|
| gene                | direction of the effect | p-value | gene              | direction of the effect | p-value | gene                  | direction of the effect | p-value7 |
| bcl2                | -631,78                 | 0,0084  | insr              | -263,0                  | 0,0003  | paxip1                | 44,34                   | 0,003    |
| insr                | -263,00                 | 0,0003  | six4              | 35,9                    | 0,0018  | prmt5                 | 223,46                  | 0,006    |
| six4                | 35,88                   | 0,0018  | foxl2             | 246,0                   | 0,0066  | wac                   | -128,71                 | 0,008    |
| foxl2               | 245,97                  | 0,0066  | sox9              | -350,0                  | 0,0067  | mtf2                  | 165,80                  | 0,007    |
| ptx3                | -223,55                 | 0,0037  | dmrt1             | -292,7                  | 0,0065  | pcgf6                 | 21,08                   | 0,008    |
| tcf7                | 367,51                  | 0,0066  | tmem184a          | 32,5                    | 0,0032  | parg                  | 145,11                  | 0,006    |
| tgfb2               | -779,96                 | 0,0092  |                   |                         |         | pcgf5                 | -38,01                  | 0,003    |
| EIF2B4              | 55,26                   | 0,0038  |                   |                         |         | hdac1                 | 208,51                  | 0,002    |
| rdh10               | 256,98                  | 0,0023  |                   |                         |         | zmpste24              | 173,91                  | 0,000    |
| sox9                | -349,98                 | 0,0067  |                   |                         |         | asxl2                 | -115,91                 | 0,006    |
| dmrt1               | -292,73                 | 0,0065  |                   |                         |         | prkd2                 | -85,95                  | 0,002    |
| amh                 | -13130,47               | 0,0047  |                   |                         |         | ppp5c                 | 88,36                   | 0,008    |
| lgr4                | -81,47                  | 0,0096  |                   |                         |         | ruvbl2                | 74,33                   | 0,003    |
| gas2                | -330,17                 | 0,0035  |                   |                         |         | nsd1                  | -74,40                  | 0,007    |
| cbx2                | 105,19                  | 0,0047  |                   |                         |         | lmna                  | 230,97                  | 0,001    |
| tbc1d20             | 61,47                   | 0,0037  |                   |                         |         | brms1l                | 29,99                   | 0,003    |
| angpt1              | -438,16                 | 0,0057  |                   |                         |         | ash2l                 | 86,93                   | 0,001    |
| ago4                | -95,22                  | 0,0055  |                   |                         |         | setd5                 | -268,17                 | 0,005    |
| jmjd1c              | -221,58                 | 0,0015  |                   |                         |         | tada3                 | 45,48                   | 0,010    |
| aromata             |                         |         |                   |                         |         | hdac7                 | -166,63                 | 0,002    |
| se                  | 1991,61                 | 0,0045  |                   |                         |         | auts2                 | -260,43                 | 0,002    |
|                     |                         |         |                   |                         |         | kansl1                | -224,33                 | 0,010    |
|                     |                         |         |                   |                         |         | fmr1                  | 82,03                   | 0,006    |
|                     |                         |         |                   |                         |         | hopx                  | -191,18                 | 0,009    |
|                     |                         |         |                   |                         |         | pcgf1                 | 42,06                   | 0,010    |
|                     |                         |         |                   |                         |         | ccna2                 | 616,58                  | 0,004    |
|                     |                         |         |                   |                         |         | ctbp1                 | -223,82                 | 0,001    |
|                     |                         |         |                   |                         |         | smarcd1               | 54,69                   | 0,002    |
|                     |                         |         |                   |                         |         | noc2l                 | 92,77                   | 0,009    |
|                     |                         |         |                   |                         |         | suv39h1               | 25,43                   | 0,002    |
|                     |                         |         |                   |                         |         | eed                   | 63,74                   | 0,000    |
|                     |                         |         |                   |                         |         | men1                  | 57,21                   | 0,008    |
|                     |                         |         |                   |                         |         | uhrf1                 | 339,56                  | 0,002    |
|                     |                         |         |                   |                         |         | actl6a                | 140,25                  | 0,001    |
|                     |                         |         |                   |                         |         | mier2                 | 34,26                   | 0,009    |
|                     |                         |         |                   |                         |         | bcl6                  | -144,20                 | 0,004    |
|                     |                         |         |                   |                         |         | gfi1                  | -20,71                  | 0,008    |

|  |        |         |       |
|--|--------|---------|-------|
|  | smyd2  | 131,17  | 0,002 |
|  | usp3   | 41,95   | 0,007 |
|  | sin3a  | -194,65 | 0,003 |
|  | kpna7  | 660,98  | 0,007 |
|  | pkn1   | 188,11  | 0,001 |
|  | lef1   | 211,69  | 0,002 |
|  | prkcb  | -99,81  | 0,008 |
|  | ep300  | -287,62 | 0,003 |
|  | dnmt1  | 163,76  | 0,002 |
|  | prmt1  | 311,66  | 0,006 |
|  | carm1  | 124,62  | 0,000 |
|  | kat2b  | -91,65  | 0,001 |
|  | ehmt2  | 70,12   | 0,004 |
|  | jmjd1c | -221,58 | 0,002 |
|  | bcor   | -25,94  | 0,003 |

---

**Table S3.** Descriptive information regarding sampling

| <b>Stages :</b> |                           | <b>Open mouth</b> | <b>Flexion</b> | <b>All Fins</b> | <b>Juveniles (early)</b> | <b>Juveniles (late)</b> | <b>Values for all late juveniles with SD</b> |  |
|-----------------|---------------------------|-------------------|----------------|-----------------|--------------------------|-------------------------|----------------------------------------------|--|
| <b>HT</b>       | DD10 °C                   | 77                | 242            | 550             | 1254 at HT; 1054 at LT   |                         |                                              |  |
|                 | weight (g)                | n/a               | 0.004 (0.002)  | 0.077 (0.024)   | 4.88 (1.17)              | 102.3                   | 97.0 (34.4)                                  |  |
|                 | length (cm)               | n/a               | 1.3 (0.1)      | 2.2 (0.17)      | 7.33 (0.57)              | 19.96                   | 19.47 (2.09)                                 |  |
|                 | age (dph)                 | 10                | 25             | 53              | 117                      | 392                     |                                              |  |
|                 | Number sampled per family | Fam1              | 13             | 12              | 28                       | 15                      |                                              |  |
|                 |                           | Fam2              | 10             | 9               | 17                       | 6                       |                                              |  |
|                 |                           | Fam3              | 15             | 8               | 16                       | 7                       |                                              |  |
|                 |                           | Fam4              | 4              | 10              | 18                       | 6                       |                                              |  |
|                 |                           | Fam5              | 18             | 16              | 30                       | 20                      |                                              |  |
|                 |                           | Fam6              | 2              | 3               | 7                        | 3                       |                                              |  |
|                 |                           | Fam7              | 13             | 13              | 17                       | 5                       |                                              |  |
|                 |                           | Fam8              | 5              | 13              | 27                       | 8                       |                                              |  |
|                 | weight (g)                | n/a               | 0.008 (0.004)  | 0.134 (0.064)   | 4.67 (1.21)              | 81.8                    | 79.5 (25.9)                                  |  |
|                 | length (cm)               | n/a               | 1.4 (0.13)     | 2.4 (0.35)      | 7.31 (5.9)               | 18.4                    | 18.24 (1.74)                                 |  |
| age (dph)       | 13                        | 40                | 78             | 124             | 392                      |                         |                                              |  |
| <b>LT</b>       | Number sampled per family | Fam1              | 9              | 13              | 25                       | 10                      |                                              |  |
|                 |                           | Fam2              | 5              | 5               | 20                       | 10                      |                                              |  |
|                 |                           | Fam3              | 5              | 10              | 12                       | 10                      |                                              |  |
|                 |                           | Fam4              | 4              | 9               | 6                        | 0                       |                                              |  |
|                 |                           | Fam5              | 9              | 20              | 29                       | 10                      |                                              |  |
|                 |                           | Fam6              | 3              | 5               | 7                        | 6                       |                                              |  |
|                 |                           | Fam7              | 3              | 10              | 2                        | 16                      |                                              |  |
|                 |                           | Fam8              | 9              | 6               | 17                       | 8                       |                                              |  |
| Genotyping      | Yes                       | Yes               | Yes            | Yes             | Yes                      | Yes                     |                                              |  |
| RNA-seq         | No                        | Whole Body        | Whole Body     | Gonads          | No                       | No                      |                                              |  |
| Energy          | No                        | No                | Yes            | Yes             | No                       | No                      |                                              |  |
| DNA methylation | No                        | No                | No             | No              | No                       | Yes                     |                                              |  |
| Sexing          | No                        | No                | No             | Gonad histology | Visual inspection        |                         |                                              |  |

**Table S4.** RNA integrity, A260/A280 and A260/A230 for all samples used in the RNA-seq

| <b>Sample name</b>                 | <b>RIN</b> | <b>A260/A280</b> | <b>A260/A230</b> |       |
|------------------------------------|------------|------------------|------------------|-------|
| <b>flexion stage - whole body</b>  |            |                  |                  |       |
| P2                                 | 16 04      | 8,7              | 2,043            | 2,131 |
| P2                                 | 16 06      | 8.3              | na               | na    |
| P2                                 | 16 13      | 8,9              | 2,032            | 2,214 |
| P2                                 | 16 28      | 8,1              | na               | na    |
| P2                                 | 16 29      | 8.6              | na               | na    |
| P2                                 | 21 11      | 8.4              | na               | na    |
| P2                                 | 21 14      | 8.2              | na               | na    |
| P2                                 | 21 27      | 8,8              | 1,966            | 2,163 |
| P2                                 | 21 28      | 8,3              | 2,007            | 2,042 |
| P2                                 | 21 31      | 9.4              | na               | na    |
| <b>all fins stage - whole body</b> |            |                  |                  |       |
| P3                                 | 16 01      | 9,6              | 2,076            | 2,010 |
| P3                                 | 16 03      | 9,1              | 2,044            | 2,045 |
| P3                                 | 16 04      | 9,6              | 2,045            | 1,881 |
| P3                                 | 16 05      | 9,1              | 2,032            | 2,033 |
| P3                                 | 16 06      | 9,7              | 2,056            | 1,835 |
| P3                                 | 16 07      | 9,7              | 2,059            | 1,856 |
| P3                                 | 16 08      | 9,1              | 2,055            | 2,045 |
| P3                                 | 16 09      | 9,0              | 2,033            | 2,030 |
| P3                                 | 16 10      | 9,6              | 2,092            | 1,962 |
| P3                                 | 16 11      | 10,0             | 2,059            | 2,008 |
| P3                                 | 16 12      | 9,8              | 2,096            | 1,950 |
| P3                                 | 16 13      | 9,6              | 2,053            | 2,040 |
| P3                                 | 16 14      | 9,7              | 2,088            | 1,967 |
| P3                                 | 16 15      | 9,1              | 2,030            | 2,034 |
| P3                                 | 16 16      | 9,0              | 2,040            | 2,220 |
| P3                                 | 16 17      | 9,7              | 2,051            | 1,989 |
| P3                                 | 16 18      | 8,9              | 2,041            | 2,151 |
| P3                                 | 16 19      | 9,4              | 2,037            | 2,141 |
| P3                                 | 16 20      | 9,4              | 2,078            | 1,976 |
| P3                                 | 16 21      | 9,0              | 2,040            | 2,274 |
| P3                                 | 16 22      | 9,6              | 2,075            | 1,818 |
| P3                                 | 16 23      | 10,0             | 2,071            | 1,823 |
| P3                                 | 16 24      | 9,0              | 2,069            | 1,846 |
| P3                                 | 16 25      | 9,2              | 2,039            | 2,202 |
| P3                                 | 16 26      | 9,5              | 2,072            | 1,747 |
| P3                                 | 16 27      | 9,0              | 2,099            | 2,117 |

|    |       |     |       |       |
|----|-------|-----|-------|-------|
| P3 | 16 28 | 9,3 | 2,055 | 2,237 |
| P3 | 16 29 | 9,2 | 2,059 | 2,022 |
| P3 | 16 30 | 9,5 | 2,060 | 2,073 |
| P3 | 21 01 | 9,2 | 2,038 | 2,248 |
| P3 | 21 02 | 9,1 | 2,065 | 2,270 |
| P3 | 21 03 | 9,5 | 2,069 | 2,153 |
| P3 | 21 04 | 9,5 | 2,056 | 2,381 |
| P3 | 21 05 | 9,2 | 2,055 | 2,234 |
| P3 | 21 06 | 8,9 | 2,052 | 2,298 |
| P3 | 21 07 | 9,4 | 2,012 | 2,158 |
| P3 | 21 08 | 9,2 | 2,026 | 2,214 |
| P3 | 21 09 | 9,3 | 2,045 | 1,957 |
| P3 | 21 10 | 9,2 | 2,055 | 2,228 |
| P3 | 21 11 | 9,1 | 2,050 | 2,195 |
| P3 | 21 12 | 9,4 | 2,044 | 2,011 |
| P3 | 21 13 | 8,0 | 2,029 | 2,212 |
| P3 | 21 14 | 9,4 | 2,038 | 2,115 |
| P3 | 21 16 | 9,1 | 1,994 | 2,023 |
| P3 | 21 17 | 9,2 | 2,060 | 2,174 |
| P3 | 21 18 | 9,1 | 2,043 | 2,291 |
| P3 | 21 19 | 9,4 | 2,051 | 2,245 |
| P3 | 21 20 | 9,0 | 2,066 | 2,254 |
| P3 | 21 21 | 9,0 | 2,062 | 2,224 |
| P3 | 21 22 | 9,1 | 2,045 | 2,185 |
| P3 | 21 23 | 9,3 | 2,014 | 2,223 |
| P3 | 21 24 | 9,1 | 2,040 | 2,162 |
| P3 | 21 25 | 9,1 | 2,017 | 2,343 |
| P3 | 21 26 | 8,9 | 2,019 | 2,360 |
| P3 | 21 27 | 9,2 | 2,030 | 2,261 |
| P3 | 21 28 | 9,1 | 2,041 | 2,296 |
| P3 | 21 29 | 9,0 | 2,066 | 2,029 |
| P3 | 21 30 | 9,7 | 2,010 | 2,186 |
| P3 | 21 31 | 8,9 | 2,044 | 2,295 |
| P3 | 21 32 | 9,2 | 2,041 | 2,060 |
| P3 | 21 33 | 9,5 | 2,047 | 2,125 |
| P3 | 21 34 | 9,2 | 2,043 | 2,273 |
| P3 | 21 35 | 9,4 | 2,054 | 2,230 |
| P3 | 21 36 | 8,9 | 2,053 | 2,294 |
| P3 | 21 37 | 9,3 | 2,049 | 2,198 |
| P3 | 21 38 | 9,2 | 2,048 | 2,303 |
| P3 | 21 39 | 9,2 | 2,058 | 2,112 |
| P3 | 21 40 | 9,3 | 2,060 | 1,927 |

**juveniles stage - gonades**



|    |            |     |       |       |
|----|------------|-----|-------|-------|
| P4 | 16 CHNS 13 | 8,7 | 1,778 | 1,585 |
| P4 | 16 CHNS 10 | 9,2 | 1,865 | 1,588 |
| P4 | 16 CHNS 11 | 9,1 | 1,619 | 1,132 |
| P4 | 16 CHNS 12 | 9,2 | 1,744 | 1,615 |
| P4 | 16 CHNS 14 | 8,7 | 1,852 | 2,008 |
| P4 | 16 CHNS 15 | 8,5 | 1,874 | 1,320 |
| P4 | 16 CHNS 4  | 8,4 | 1,810 | 1,747 |
| P4 | 16 CHNS 5  | 8,7 | 1,814 | 2,051 |
| P4 | 16 CHNS 6  | 9,1 | 1,659 | 1,054 |
| P4 | 16 CHNS 7  | 9,2 | 1,838 | 1,398 |
| P4 | 16 CHNS 9  | 9,4 | 1,810 | 1,685 |
| P4 | 16 CORT 10 | 8,8 | 1,812 | 1,900 |
| P4 | 16 CORT 11 | 8,8 | 1,782 | 1,815 |
| P4 | 16 CORT 12 | 9,0 | 1,925 | 1,524 |
| P4 | 16 CORT 13 | 8,8 | 1,734 | 0,848 |
| P4 | 16 CORT 14 | 9,8 | 1,746 | 0,648 |
| P4 | 16 CORT 15 | 8,6 | 1,847 | 1,201 |
| P4 | 16 CORT 5  | 9,9 | 1,731 | 1,114 |
| P4 | 16 CORT 6  | 8,7 | 1,869 | 1,428 |
| P4 | 16 CORT 7  | 8,3 | 1,632 | 1,097 |
| P4 | 16 CORT 8  | 8,9 | 1,841 | 1,907 |
| P4 | 16 CORT 9  | 9,2 | 1,831 | 1,092 |
| P4 | 21 CHNS 10 | 9,2 | 1,944 | 1,266 |
| P4 | 21 CHNS 11 | 9,1 | 1,808 | 1,926 |
| P4 | 21 CHNS 12 | 8,6 | 1,858 | 1,874 |
| P4 | 21 CHNS 13 | 9,4 | 1,825 | 1,884 |
| P4 | 21 CHNS 14 | 9,2 | 1,857 | 1,729 |
| P4 | 21 CHNS 15 | 8,7 | 1,814 | 1,591 |
| P4 | 21 CHNS 5  | 8,8 | 1,763 | 1,559 |
| P4 | 21 CHNS 6  | 8,4 | 1,767 | 1,829 |
| P4 | 21 CHNS 8  | 8,5 | 1,792 | 2,072 |
| P4 | 21 CHNS 9  | 9,0 | 1,826 | 2,134 |
| P4 | 21 CORT 10 | 8,8 | 1,849 | 1,921 |
| P4 | 21 CORT 11 | 8,5 | 1,892 | 0,716 |
| P4 | 21 CORT 12 | 8,4 | 1,794 | 2,059 |
| P4 | 21 CORT 13 | 8,9 | 1,773 | 1,758 |
| P4 | 21 CORT 14 | 9,0 | 1,944 | 0,850 |
| P4 | 21 CORT 15 | 9,0 | 1,812 | 1,813 |
| P4 | 21 CORT 5  | 8,5 | 1,798 | 1,673 |
| P4 | 21 CORT 6  | 9,3 | 1,852 | 1,304 |
| P4 | 21 CORT 7  | 8,8 | 1,802 | 1,212 |
| P4 | 21 CORT 8  | 8,8 | 1,782 | 1,964 |
| P4 | 21 CORT 9  | 8,4 | 1,738 | 1,216 |

## Legends for Datasets S1 to S4

Dataset S1: DESeq2 Normalized counts of fish at the flexion stage

Dataset S2: DESeq2 comparison between 16 and 21 genes differentially expressed for fish at the flexion stage

Dataset S3: DESeq2 Normalized counts of fish at the all fin stage

Dataset S4: DESeq2 Normalized counts of fish at the early juvenile stage

## SI References

Sample References:

1. R. Griot, *et al.*, APIS: An auto-adaptive parentage inference software that tolerates missing parents. *Molecular Ecology Resources* **20**, 579–590 (2020).
2. B. J. Smith, boa: An R Package for MCMC Output Convergence Assessment and Posterior Inference. *Journal of Statistical Software* **21**, 1–37 (2007).
3. N. R. Wray, J. Yang, M. E. Goddard, P. M. Visscher, The Genetic Interpretation of Area under the ROC Curve in Genomic Profiling. *PLOS Genetics* **6**, e1000864 (2010).
4. X. Zhang, D. Lourenco, I. Aguilar, A. Legarra, I. Misztal, Weighting Strategies for Single-Step Genomic BLUP: An Iterative Approach for Accurate Calculation of GEBV and GWAS. *Frontiers in Genetics* **7**, 151 (2016).
5. P. M. VanRaden, Efficient Methods to Compute Genomic Predictions. *Journal of Dairy Science* **91**, 4414–4423 (2008).
6. D. A. L. Lourenco, *et al.*, Genetic evaluation using single-step genomic best linear unbiased predictor in American Angus1. *Journal of Animal Science* **93**, 2653–2662 (2015).
7. S. Faggion, M. Vandeputte, B. Chatain, P.-A. Gagnaire, F. Allal, Population-specific variations of the genetic architecture of sex determination in wild European sea bass *Dicentrarchus labrax* L. *Heredity* **122**, 612–621 (2019).
8. A. Goikoetxea, *et al.*, Genetic pathways underpinning hormonal stress responses in fish exposed to short- and long-term warm ocean temperatures. *Ecological Indicators* **120**, 106937 (2021).
9. B. Geffroy, RNA-Seq juveniles de bar: Projet 3S (Seabass, Sex and Stress). *Sextant* (2018) (November 26, 2021).
10. D. Kim, *et al.*, TopHat2: accurate alignment of transcriptomes in the presence of insertions, deletions and gene fusions. *Genome Biology* **14**, R36 (2013).
11. B. Langmead, S. L. Salzberg, Fast gapped-read alignment with Bowtie 2. *Nature Methods* **9**, 357–359 (2012).
12. M. Tine, *et al.*, European sea bass genome and its variation provide insights into adaptation to euryhalinity and speciation. *Nature Communications* **5**, 5770 (2014).
13. H. Li, *et al.*, The Sequence Alignment/Map format and SAMtools. *Bioinformatics* **25**, 2078–2079 (2009).
14. Y. Liao, G. K. Smyth, W. Shi, featureCounts: an efficient general purpose program for assigning sequence reads to genomic features. *Bioinformatics* **30**, 923–930 (2014).
15. F. Krueger, S. R. Andrews, Bismark: a flexible aligner and methylation caller for Bisulfite-Seq applications. *Bioinformatics* **27**, 1571–1572 (2011).
16. A. Akalin, *et al.*, methylKit: a comprehensive R package for the analysis of genome-wide DNA methylation profiles. *Genome Biology* **13**, R87 (2012).
17. F. Piferrer, M. Blázquez, L. Navarro, A. González, Genetic, endocrine, and environmental components of sex determination and differentiation in the European sea bass (*Dicentrarchus labrax* L.). *General and Comparative Endocrinology* **142**, 102–110 (2005).
18. M. Vandeputte, *et al.*, Low temperature has opposite effects on sex determination in a marine fish at the larval/postlarval and juvenile stages. *Ecology and Evolution* **10**, 13825–13835 (2020).
